# Supplementary material for: Changes in government health spending and short-term mortality in four European countries in the 21st century
Source: Research Square preprint supplement (doi:10.21203/rs.3.rs-7772794/v1), 2025-12-09
Supplement: Supplementary file 1 [file 900fe7858cbbe005513352a6.docx]

**eTable 1. Definitions and data sources for mortality and economic variables.**

| **All-cause mortality and population:** The number of deaths from all causes by age group, month of the year and calendar-year, and populations by age group at the beginning and mid-year were obtained from the National Statistical Offices of each country.  England/Wales:   - Deaths from 2001 to 2014 were obtained from the website of the Office for National Statistics. <https://www.ons.gov.uk/peoplepopulationandcommunity/birthsdeathsandmarriages/deaths/adhocs/006478deathsoccurringbysingleyearofagebysexyearandmonthofdeathforusualresidentsofenglandandwales1993to2014>. - Deaths from 2015 to 2019 were provided directly by the Office for National Statistics. - Population was obtained from the website of the Office for National Statistics. <https://www.ons.gov.uk/peoplepopulationandcommunity/populationandmigration/populationestimates/datasets/populationestimatesforukenglandandwalesscotlandandnorthernireland>.   Scotland:   - Deaths from 2005-2019 were obtained from the website of the National Records of Scotland/ScotlandsPeople. <https://www.nrscotland.gov.uk/statistics-and-data/statistics/statistics-by-theme/vital-events>. - Deaths from 2001 to 2004 were provided directly by the National Records of Scotland/ScotlandsPeople. - Population was obtained from the website of the National Records of Scotland/ScotlandsPeople. <https://www.nrscotland.gov.uk/statistics-and-data/statistics/statistics-by-theme/vital-events>.   Italy:   - Deaths from 2003 to 2019 were obtained from the website of Istituto Nazionale di Statistica (ISTAT). ISTAT. Mortality by place of registration: education level, marital status and month of death. Available in: <http://dati.istat.it/Index.aspx?QueryId=26434&lang=en> (Accessed 25 April 2024). - Deaths from 2001 and 2002 were provided directly to researchers by the ISTAT. - Population was obtained from the website of Istituto Nazionale di Statistica (ISTAT).   Spain:  Both deaths and mid-year populations were obtained from the website of the Spanish Statistical Office (INE).   - Deaths. <https://www.ine.es/dyngs/INEbase/en/operacion.htm?c=Estadistica_C&cid=1254736177008&menu=resultados&idp=1254735573002>. - Population was obtained from the website of INE. <https://www.ine.es/dynt3/inebase/es/index.htm?padre=1894&capsel=1895>.   Greece:   - Deaths were provided directly to the researchers by the Hellenic Statistical Authority (ELSTAT) - Population was obtained from the website of ELSTAT. <http://www.statistics.gr/statistics/-/publication/SPO18/2014>.   **Government health expenditure:** It refers to the final consumption of health care goods and services including personal health care (curative care, rehabilitative care, long-term care, inpatient medical care, ambulatory or out-patient medical care, ancillary services and medical or pharmaceutical products, appliances and equipment) and collective services (prevention and public health services as well as health administration). It includes only provision of health care by government or social health insurance schemes (public health expenditure) and compulsory private health insurance programmes (mandatory private health expenditure). Household out-of-pocket spending (including co-payments) is not included in the government health expenditure Sickness cash benefits related to loss of earnings because of the temporary inability to work due to illness are not included in health expenditure sino in other social expenditures. All health expenditure recorded under public or mandatory private health expenditure concerns current expenditure on health (CHE) which covers both individual and collective services. Therefore, current expenditure on health does not include capital transfers such as investment grants from governments to hospitals. For some countries, there is an issue with items recorded as spending on services for elderly and/or persons with disabilities provided by institutions other than hospitals also being included under public expenditure on health. UK data in 2019 may be underestimated partly due to underreporting of local government spending.  Source of data: OECD Social Expenditure Database (SOCX). Organization for Economic Cooperation and Development (OECD). <https://stats.oecd.org/Index.aspx?datasetcode=SOCX_AGG>. SOCX aggregated data as well as sources and methodology are described in The OECD SOCX Manual 2019 Edition. A guide to the OECD Social Expenditure. <http://www.oecd.org/social/soc/SOCX_Manuel_2019.pdf> (Accessed on 25 April 2024).  **Non-health government social expenditure:** It refers to all public and mandatory private social expenditure, except health expenditures. It comprises cash benefits, direct in-kind provision of goods and services, and tax breaks with social purposes. Social benefits are classified as public when general government (that is central, state, and local governments, including social security funds) controls the relevant financial flows. Mandatory private social expenditure refers to social support stipulated by legislation but operated through the private sector, e.g., direct sickness payments by employers to their absent employees as legislated by public authorities, or benefits accruing from mandatory contributions to private insurance funds. The main social policy areas included are as follows: old age (elderly), survivors, incapacity-related benefits, family, active labor market programmes, unemployment, housing, and other social policy areas. UK data in 2019 may be underestimated partly due to underreporting of local government spending  Source of data: OECD Social Expenditure Database (SOCX). Organization for Economic Cooperation and Development (OECD). <https://stats.oecd.org/Index.aspx?datasetcode=SOCX_AGG>. SOCX aggregated data as well as sources and methodology are described in The OECD SOCX Manual 2019 Edition. A guide to the OECD Social Expenditure. <http://www.oecd.org/social/soc/SOCX_Manuel_2019.pdf> (Accessed on 25 April 2024).  **Real GDP per capita:** This is calculated as the ratio of real gross domestic product (GDP) in 2015 US dollars ($) at constant prices and constant purchasing power parities (PPPs) to the average population for a specific year. Real GDP is an inflation-adjusted measure that reflects the value of all goods and services produced by an economy in a given year minus the value of any goods or services used in their creation, expressed in base-year prices. This metric eliminates the differences in price levels between countries. GDP is calculated using the expenditure approach. The ratio or the difference in its value in the current year with respect to the previous year is an indicator of the country's economic growth.  Source of data: OECD. National Accounts. Main Aggregate. Gross Domestic Product (GDP): GDP per head, US$, constant prices, constant PPPs, reference year 2015 (Accessed on 25 April 2024). https://stats.oecd.org/index.aspx?queryid=60702 |
| --- |

**eTable 2. Definitions and data sources for variables on influenza activity, heatwaves and coldwaves.**

| **Influenza activity**: The intensity of influenza activity is based on the overall level of clinical influenza activity in the country, measured as influenza-like illness (ILI)/acute respiratory infection (ARI) consultation rate. Each country assesses the intensity of clinical activity by comparing current ILI/ARI rates with country-specific baseline rates outside of the influenza season and with historical values at its disposal. During 2001-2009 the published data of influenza activity referred to each epidemiological influenza season, this is generally between week 40-41 of one year and weeks 16-20 of the following year. For the purposes of this study the data for a given epidemiological season were assigned to the year in which it ended. During 2010-2019 influenza activity refers to the entire year because the influenza activity is monitored throughout the year in Europe, although more intensely from early October (week 40) of the previous year to the end of May (week 20) of the current year. Influenza activity is classified into four categories: 1. Low: no activity or activity at baseline level. Baseline level is calculated nationally and it is the level at which clinical influenza activity remains throughout non-epidemic periods (the summer and most of the winter) based on historical data (5-10 influenza seasons), 2. Medium: usual levels of activity; the activity is above baseline threshold level in the country but still within the range previously seen. 3. High: The influenza activity is higher than previously seen (high or very high between 1-4 weeks in the year for 2010-2019), 4. Very high: The influenza activity is much higher than observed during previous years (high or very high for more than 5 weeks in the year for 2010-2019). Data for Greece during 2001-2005 were imputed from data for Italy.  Source of data:  -2001-2007: data come European Influenza Surveillance Scheme (EISS) coordinated by NIVEL, Utrech, Netherlands. Their seasonal or annual reports on influenza activity can be consulted on their web page: <https://www.nivel.nl/en/dossiers-clustered-information/dossier-epidemiology-respiratory-viruses>.  -2008-2019: data come from European Centre for Disease Prevention and Control (ECDC), either from its Annual Epidemiological Reports on Communicable Diseases in Europe or in its specific reports on seasonal influenza. Both types of reports can be consulted at: <https://www.ecdc.europa.eu/en/publications-data/monitoring/all-annual-epidemiological-reports>. The data can also be consulted at: European Centre for Disease Prevention and Control. Surveillance atlas of infectious diseases. Stockholm: ECDC; 2017 [cited September 2022]. Available from: <http://atlas.ecdc.europa.eu/public/index.aspx>.  **Heatwave and coldwave:** There is no international consensus around the definition of these variables. In general, it is considered that there is a heatwave when daily temperatures over several consecutive days exceed an extreme temperature percentile or threshold (i.e 95th) and that there is a coldwave when daily temperatures over several consecutive days stays below a certain percentile (i.e.5th). However, thresholds may vary for each country and region. For these reasons, in this work each of these two variables was introduced as variables with three categories of intensity for heatwave and two for coldwave, whose value for calendar-year and country was decided based on data from the main meteorological agencies or in scientific articles. The main documents used to make the decision are included below. Spring-summer heatwaves occurred in 2003 and 2015 in all three countries, as well as in 2006 and 2013 in United Kingdom, in 2012 in Spain, and in 2007, 2010 and 2012 in Greece. Coldwaves activity occurred in 2012 and 2015 in all three countries, as well as in 2002 in Spain and Greece and 2005 in Spain.  *Source of data:*  United Kingdom:   - Kendon M, McCarthy M, Jevrejeva S, Legg T. State of de UK climate 2016. MetOffice Hadley Centre: UK, Exeter, 2017. <https://www.metoffice.gov.uk/climate/uk/about/state-of-climate>. (Accessed 12th May 2019). - Kendon M, McCarthy M, Jevrejeva S, Matthews A, Legg T. State of the UK climate 2017. Int J Climatol. 2018;38 (Suppl. 2):1–35. <https://doi.org/10.1002/joc.5798>. Kendon M, McCarthy M, Jevrejeva S, Matthews A, Legg T. State of the UK Climate 2017: Supplementary report on climate extremes. MetOffice Hadley Centre: UK, Exeter, 2018. <https://www.metoffice.gov.uk/climate/uk/about/state-of-climate>. (Accessed 12th May 2019). - Green HK, Andrews N, Armstrong B, Bickler G, Pebody R. Mortality during the 2013 heatwave in England–how did it compare to previous heatwaves? A retrospective observational study. Environ Res. 2016;147:343–9. doi: 10.1016/j.envres.2016.02.028. - Arbuthnott KG, Hajat S.The health effects of hotter summers and heat waves in the population of the United Kingdom: a review of the evidence. Environmental Health 2017, 16(Suppl 1):119. DOI 10.1186/s12940-017-0322-5. - Met Office. Annual reports on State of the UK Climate. <https://www.metoffice.gov.uk/research/climate/maps-and-data/about/state-of-climate> (Accessed 23 April 2024). For example: State of the UK Climate 2017: Supplementary report on Climate Extremes. - Met Office. Heatwave 1 July 2015-Met Office (2015) <https://www.metoffice.gov.uk/climate/uk/interesting/july2015> (Accessed 12th May 2019).   Spain   - Agencia Estatal de Meteorología (AEMET). Olas de calor en España desde 1975 (Actualizado en octubre de 2023). <https://www.aemet.es/es/conocermas/recursos_en_linea/publicaciones_y_estudios/estudios/detalles/olascalor> (Accessed on 24 April 2024). - Agencia Estatal de Meteorología (AEMET). Olas de frío en España desde 1975 (Actualizado en octubre de 2023). <https://www.aemet.es/es/conocermas/recursos_en_linea/publicaciones_y_estudios/estudios/detalles/olas_frio> (Accessed on 25 April 2024).   Greece:   - Tolika K, Panagiotis M, Tegoulias I. Extreme temperatures in Greece during 2007: Could this be a ‘‘return to the future’’? Geophysical Research Letters 2009; 36, L10813, doi:10.1029/2009GL038538. - Founda, D. & Giannakopoulos, C. The exceptionally hot summer of 2007 in Athens, Greece – A typical summer in the future - climate? Global and Planetary Change 67, 227–236 (2009). - Papagiannaki K, Lagouvardos K, Kotroni V. A database of high-impact weather events in Greece: a descriptive impact analysis for the period 2001–2011. Nat. Hazards Earth Syst. Sci., 13, 727–736, 2013. doi:10.5194/nhess-13-727-2013. - Paravantis J, Santamouris M, Cartalis C.*, Efthymiou C, Kontoulis N. Mortality associated with high ambient temperatures, heatwaves, and the urban heat island in Athens, Greece. Sustainability 2017, 9, 606; doi:10.3390/su9040606. - Tolika K. Assessing heat waves over Greece using the Excess Heat Factor (EHF). Climate 2019, 7(1), 9; <https://doi.org/10.3390/cli7010009>. - Paget WJ, Meerhoff TJ, Goddard NL: Mild to moderate influenza activity in Europe and the detection of novel A(H1N2) and B viruses during the winter of 2001-02. Euro Surveill. 2002, 7: 147-157 - Arkema JMS, Meijer A, Meerhoffd TJ, Van Der Velden J, Paget WJ, European Influenza Surveillance Schema (EISS). Epidemiological and virological assessment of influenza activity in Europe, during the 2006-2007 winter. Euro Surveill 2008; 13: 18958. - Mazick A, Gergonne B, Nielsen J, Wuilaume F, Viirtanen MJ Fouillet A et al. Excess mortality among the elderly in 12 European countries, February and March 2012. Euro Surveill 2012;17: 20138. - Mølbak K, Espenhain L, Nielsen J, Tersago K, Bossuyt N, Denissov G, et al. Excess mortality among the elderly in European countries, December 2014 to February 2015. Euro Surveill 2015;20:4.   Italia   - Betti G. Il calore afoso in Italia nel periodo 1979-2016. Tesi di laurea magistrale. Universitá di Pisa. <https://etd.adm.unipi.it/t/etd-01182017-221136/> - Istituto Superiori per la Protezione e la Ricerca Ambientae (ISPRA). Stato d’ell ambiente. Gli indicatori del clima in Italia. Rapporti annuali 2006-2019. <https://www.isprambiente.gov.it/it/pubblicazioni/stato-dellambiente>. |
| --- |

**eTable 3. Additional methodological details on calculation of age-standardized mortality rates and specification of generalized linear regression models.**

| **Calculation of age-standardized mortality rates** |
| --- |
| They were standardized using the direct method, applying the weights from the 2013 European Standard Population to the deaths and resident population at mid-year by 5-year age group, from the 0-4 years age-group to the 85 years and older group. |
| **General specification of the country-level fixed-effects model** |
| ln(*Rit*) = *α*0 + *α*1*Hit* + ***α***2′**C***i* + *α*3*t* + *α*4*s*1(*t*) + *α*5*s*2(*t*) + ***α***6′**X***it* + *εit*,  where *Rit* is the age-standardized mortality rate in country *i* at year *t*,  *Hit* is the health spending in country *i* at year *t* in thousands of 2015 US dollars,  **C***i* are the country indicators,  *t*, *s*1(*t*), and *s*2(*t*) are linear and restricted cubic spline terms for calendar year *t*, with internal knots at 2008 and 2014 and boundary knots at 2002 and 2019, which allow flexible time trends while avoiding implausible shapes at the ends,  **X***it* are other adjustment covariates, including heatwave, coldwave, influenza activity, GDP per capita, and non-health social spending per capita,  *α*0 is the model intercept,  *α*1 is the regression coefficient associated with health spending and gives the multiplicative factor of mortality rate for every one thousand 2015 US dollars increase in annual government health spending.  ***α***2 are the coefficients for country indicators,  *α*3, *α*4, and *α*5 are the coefficients associated with each spline term for calendar year,  ***α***6 are thecoefficients for the other adjustment covariates, and  *εit* is the error term of the model. |
| **General specification of the first-differences model** |
| ln(*Rit*/*Rit*−1) = ln(*Rit*) − ln(*Rit*−1) = *β*0 + *β*1(*Hit* − *Hit*−1) + *β*2{*s*1(*t*) − *s*1(*t*−1)} + *β*3{*s*2(*t*) – *s*2(*t*−1)} + ***β***4′(**X***it* − **X***it*−1) + *υit*,  where *Rit*−1, *Hit*−1, and **X***it*−1 are the age-standardized mortality rate, the health spending, and the adjustment covariates in each country during the previous year, respectively,  *β*0 is the model intercept,  *β*1 is the coefficient for interannual changes in health spending and gives the multiplicative factor of the interannual ratio of mortality rates per every one thousand US dollars increase in interannual difference in health spending.  *β*2 and *β*3 are the coefficients associated with lag-1 differences in each restricted cubic spline term,  ***β***4 are thecoefficients for interannual changes in the other adjustment covariates, and  *υit* is the error term of the model. |

**eTable 4. Association between annual age-standardized mortality rates and annual government health spending in GDP percent from regression models by model type and period in four European countries, 2002-2019**

|  | **N1** |  | **PC** |  | **95%CI** |
| --- | --- | --- | --- | --- | --- |
| **Non lagged regression model2** |  |  |  |  |  |
| **Country-level fixed-effect model (FE)3** |  |  |  |  |  |
| 2002-2010 | 36 |  | -4.7 |  | -6.7, -2.6 |
| 2011-2019 | 36 |  | 2.2 |  | 1.2, 3.2 |
| Total | 72 |  | -2.1 |  | -3.8, -0.2 |
| **First-differences model (FD)4** |  |  |  |  |  |
| 2002-2010 | 36 |  | -4.3 |  | -6.4, -2.3 |
| 2011-2019 | 36 |  | 2.0 |  | 1.2, 2.8 |
| Total | 72 |  | -1.3 |  | -2.4, -0.1 |
| **Lagged regression model (0-1 year lag mean)5** |  |  |  |  |  |
| **Country-level fixed-effect model (FE)3** |  |  |  |  |  |
| 2002-2010 | 36 |  | -5.1 |  | -7.4, -2.7 |
| 2011-2019 | 36 |  | 1.5 |  | 0.5, 2.5 |
| Total | 72 |  | -2.7 |  | -4.9, -0.4 |
| **First-differences model (FD)4** |  |  |  |  |  |
| 2002-2010 | 36 |  | -3.0 |  | -7.8, 2.1 |
| 2011-2019 | 36 |  | 2.5 |  | -0.2, 5.2 |
| Total | 72 |  | -2.7 |  | -4.9, -0.4 |

**PC**: Percent change in the annual mortality rate (FE model) or in the interannual mortality rate ratio (FD model) for each unit increase in annual government health spending measured as a percentage of Gross Domestic Product -GDP- (FE model) or in the interannual difference in health spending (FD model). **95%CI**: 95% confidence interval of PC. **1** It refers to the number of points in the regression models. **2** Health spending and social spending in the regression model correspond to the same year as mortality and the rest of the independent variables **3** Multiple linear regression of logarithm of age-standardized mortality rates on government health spending in GDP percent, adjusting for country, year as a restricted cubic spline and other covariates, as heatwave, coldwave, influenza activity, real GDP per capita and social spending in GDP percent. **4** Multiple linear regression of first differences between the logarithm of age-standardized mortality rate in a given year and country and its logarithm in the previous year, on first differences of health spending, adjusting for first-differences in year as a restricted cubic spline, and first-differences in the covariates heatwave, coldwave, influenza activity, real GDP per capita and social spending. **5**Health spending and social spending in the regression model correspond to the mean of the current and previous year's values.

**eTable 5. Association between annual age-standardized mortality rates and two cumulative lag structures of health spending from regression models by period and model type in four European countries, 2002-2019.**

|  | **N1** |  | **Country-level fixed-effect model (FE)2** | |  | **First-differences model (FD)3** | |
| --- | --- | --- | --- | --- | --- | --- | --- |
| **Cumulative lag structure and period** |  |  | **PC** | **95%CI** |  | **PC** | **95%CI** |
| **0-1-2 year lag mean4** |  |  |  |  |  |  |  |
| 2002-2010 | 36 |  | -14.8 | -19.9, -9.3 |  | -19.2 | -32.6, -3.2 |
| 2011-2019 | 36 |  | 5.8 | 2.5, 9.2 |  | 4.8 | 0.8, 9.0 |
| Total | 72 |  | -3.6 | -5.2, -2.0 |  | -4.5 | -8.3, -0.5 |
| **0-1-2-3 year lag mean5** |  |  |  |  |  |  |  |
| 2002-2010 | 36 |  | -14.9 | -21.2, -8.0 |  | -16.5 | -22.9, -9.7 |
| 2011-2019 | 36 |  | 4.0 | 0.7, 7.5 |  | 4.4 | -0.5, 9.4 |
| Total | 72 |  | -1.8 | -2.7, -0.9 |  | -0.6 | -2.5, 1.4 |

**PC**: Percent change in annual mortality rate (FE model) or ratio of interannual mortality rates (FD model) per one thousand US dollars increase in annual health spending (FE model) or interannual difference in health spending (FD model)**. 95%CI**: 95% confidence interval of PC. **1** It refers to the number of points in the regression models. **2** Multiple linear regression of logarithm of age-standardized mortality rates on government health spending in thousands of 2015 US dollars per capita, adjusting for country, year as a restricted cubic spline and other covariates, as heatwave, coldwave, influenza activity, real Gross Domestic Product –GDP- per capita and social spending per capita. **3** Multiple linear regression of first differences between the logarithm of age-standardized mortality rate in a given year and country and its logarithm in the previous year, on first differences of health spending, adjusting for first-differences in year as a restricted cubic spline, and first-differences in the covariates heatwave, coldwave, influenza activity, real GDP per capita and social spending. **4**Health spending and social spending in the regression model correspond to the mean of the current year, and the previous two years. **5** Health spending and social spending in the regression model correspond to the mean of the current year, and the previous three years.

**eTable 6. Association between annual age-standardized mortality rates and government health spending from step-up regression models using sequential adjustment of covariates by model type and period in four European countries, 2002-2019.**

|  |  | **N1** |  | **Country-level fixed-effects model2** | |  | **First-differences model3** | |
| --- | --- | --- | --- | --- | --- | --- | --- | --- |
| **Period and adjustment covariates** |  |  |  | **PC** | **95%CI** |  | **PC** | **95%CI** |
| **2002-2010** |  |  |  |  |  |  |  |  |
| I. Health spending |  | 36 |  | -5.4 | -10.9, 0.5 |  | -9.9 | -21.6, 3.6 |
| II. I + coldwave |  | 36 |  | -5.6 | -12.1, 1.5 |  | -11.4 | -24.1, 3.4 |
| III. II + influenza |  | 36 |  | -5.7 | -12.3, 1.5 |  | -10.8 | -24.1, 4.7 |
| IV. III + heatwave |  | 36 |  | -6.7 | -12.8, -0.1 |  | -12.4 | -17.5, -6.9 |
| V. IV + social spending |  | 36 |  | -12.0 | -15.7, -8.0 |  | -12.6 | -17.9, -7.0 |
| VI. V + GDP per capita |  | 36 |  | -12.0 | -15.7, -8.0 |  | -12.5 | -17.6, -7.1 |
| **2011-2019** |  |  |  |  |  |  |  |  |
| I. Health spending |  | 36 |  | 7.2 | 2.8, 11.7 |  | 4.5 | -2.0, 11.5 |
| II. I + coldwave |  | 36 |  | 7.3 | 2.6, 12.2 |  | 7.0 | 4.4, 9.6 |
| III. II + influenza |  | 36 |  | 8.8 | 4.6, 13.3 |  | 8.2 | 6.4, 10.0 |
| IV. III + heatwave |  | 36 |  | 6.6 | 0.9, 12.7 |  | 5.2 | 3.8, 6.6 |
| V. IV + social spending |  | 36 |  | 6.4 | 1.5, 11.6 |  | 4.7 | 2.9, 6.6 |
| VI. V + GDP per capita |  | 36 |  | 8.8 | 4.4, 13.3 |  | 5.5 | 1.9, 9.2 |
| **Total** |  |  |  |  |  |  |  |  |
| I. Health spending |  | 72 |  | -2.7 | -5.8, 0.5 |  | -3.7 | -11.5, 4.8 |
| II. I + coldwave |  | 72 |  | -2.8 | -5.3, -0.2 |  | -4.1 | -11.2, 3.7 |
| III. II + influenza |  | 72 |  | -2.1 | -3.3, -1.0 |  | -2.8 | -9.6, 4.5 |
| IV. III + heatwave |  | 72 |  | -2.1 | -4.1, -0.1 |  | -4.3 | -8.5. 0.0 |
| V. IV + social spending |  | 72 |  | -2,0 | -3.3, -0.6 |  | -4.7 | -7.9, -1.4 |
| VI. V + GDP per capita |  | 72 |  | -5.0 | -8.0, -2.0 |  | -5.6 | -9.3, -1.8 |

**PC**: Percent change in annual mortality rate (FE model) or ratio of interannual mortality rates (FD model) per one thousand US dollars increase in annual health spending (FE model) or interannual difference in health spending (FD model)**. 95%CI**: 95% confidence interval of PC. **1** It refers to the number of points in the regression models. **2** Multiple linear regression of logarithm of age-standardized mortality rates on government health spending in thousands of 2015 US dollars per capita, adjusting for country, year as a restricted cubic spline and in models II, III, IV, V and VI other covariates. **3** Multiple linear regression of first differences between the logarithm of age-standardized mortality rate in a given year and country and its logarithm in the previous year, on first differences of health spending, adjusting for first-differences in year as a restricted cubic spline, and in models II, III, IV, V and VI other covariates.

**eFigure 1. Hypothesized relationships between health spending, mortality, and adjustment covariates**

**HEALTH SPENDING**

**Influenza**

**Heatwave**

**Coldwave**

**GDP per capita / Economic growth**

**MORTALITY**

**Social spending**

Note: This is a simplified diagram that only considers the exposure (health spending) and outcome (mortality) of interest, along with the adjustment covariates. The regression models have been adjusted for GDP per capita and government social spending because the available evidence suggests that they are confounding factors in the association exposure-outcome. Regarding influenza activity, heatwaves, and coldwaves, their occurrence is apparently not closely related to health spending, but it is difficult to believe that they are not indirectly related through other omitted or unmeasured covariates. Thus, greater investment or spending in certain health or social infrastructures, or in preventive interventions (e.g., influenza vaccination) can mitigate the effects of heatwaves, coldwaves, or influenza epidemics on mortality. Furthermore, these phenomena cause significant short-term variations in mortality, and adjusting for them allows us to reduce the residual variance of the model and obtain a more precise estimate of the association. On the other hand, in some cases, the relationships between the variables considered could be bidirectional (direct and reverse causality), and this has not been represented. For example, an unexpected increase in mortality from an identified cause (e.g., heatwave, influenza, etc.) could trigger an increase in health spending to mitigate health associated problems in the present or in the future.
